# Supplementary material for: Structural diversity of oligomeric β-propellers with different numbers of identical blades
Source: eLife journal article supplement (doi:10.7554/elife.49853), 2019-10-15
Supplement: supp [file elife_poa_e49853_Figure_1_figure_supplement_1.docx]

**Figure 1– figure supplement 1.**

PkwA Velcro

GSEELAVLEGHTDYVVAVAFSPDGSLLASGSDDGTIRLWDVA

PkwA anc-prot

GSTDYVRAVAFSPDGSMLASGSDDGTIRLWDVATGEERAVLEGH

PkwA fam-cons

GSTGWVNSVAFSPDGKLLASGSDDKTVRLWDLATGKELRTLTGH

PkwA blade-cons

GSTDYVVAVAFSPDGSLLASGSDDGTIRLWDVASGEELAVLEGH

2-bladed PkwA

MTDYVVAVAFSPDGSLLASGSDDGTIRLWDVATGEELAILDGH

TDYVVAVAFSPDGSLLASGSDDGTIRLWDVATGEELAVLEGH

3-bladed PkwA

GSTDYVVAVAFSPDGSLLASGSDDGTIRLWDVATGEELAILDGH

TDYVVAVAFSPDGSLLASGSDDGTIRLWDVATGEELAVLEGH

TDYVVAVAFSPDGSLLASGSDDGTIRLWDVASGEELAVLERPHRD

4-bladed PkwA

GSTDYVVAVAFSPDGSLLASGSDDGTIRLWDVATGEELAILDGH

TDYVVAVAFSPDGSLLASGSDDGTIRLWDVATGEELAVLEDH

TDYVVAVAFSPDGSLLASGSDDGTIRLWDVATGEELAILDGH

TDYVVAVAFSPDGSLLASGSDDGTIRLWDVATGEELAVLEGH

5-bladed PkwA

GSHMTDYVVAVAFSPDGSLLASGSDDGTIRLWDVATGEELAVLEGH

TDYVVAVAFSPDGSLLASGSDDGTIRLWDVATGEELAILDGH

TDYVVAVAFSPDGSLLASGSDDGTIRLWDVATGEELAVLEDH

TDYVVAVAFSPDGSLLASGSDDGTIRLWDVATGEELAILDGH

TDYVVAVAFSPDGSLLASGSDDGTIRLWDVATGEELAVLEGH

6-bladed PkwA

GSHMTDYVVAVAFSPDGSLLASGSDDGTIRLWDVATGEELAVLEGH

TDYVVAVAFSPDGSLLASGSDDGTIRLWDVATGEELAILDGH

TDYVVAVAFSPDGSLLASGSDDGTIRLWDVATGEELAVLEDH

TDYVVAVAFSPDGSLLASGSDDGTIRLWDVATGEELAILDGH

TDYVVAVAFSPDGSLLASGSDDGTIRLWDVATGEELAVLEGH

TDYVVAVAFSPDGSLLASGSDDGTIRLWDVASGEELAVLEGH
