# Supplementary material for: Structural diversity of oligomeric β-propellers with different numbers of identical blades
Source: eLife journal article supplement (doi:10.7554/elife.49853), 2019-10-15
Supplement: supp [file elife_poa_e49853_Figure_2_figure_supplement_1.docx]

**Figure 2– figure supplement 1.**

Single WRAP blade

GAMGSSSVWGVAFSPDGQTIASASDDKTVKLWNRNGQLLQTLTGH

2-bladed WRAP

GAMGSSSVWGVAFSPDGQTIASASDDKTVKLWNRNGQLLQTLTGH

SSSVWGVAFSPDGQTIASASDDKTVKLWNRNGQLLQTLTGH

3-bladed WRAP

GAMGSSSVWGVAFSPDGQTIASASDDKTVKLWNRNGQLLQTLTGH

SSSVWGVAFSPDGQTIASASDDKTVKLWNRNGQLLQTLTGH

SSSVWGVAFSPDGQTIASASDDKTVKLWNRNGQLLQTLTGH

4-bladed WRAP

GAMGSSSVWGVAFSPDGQTIASASDDKTVKLWNRNGQLLQTLTGH

SSSVWGVAFSPDGQTIASASDDKTVKLWNRNGQLLQTLTGH

SSSVWGVAFSPDGQTIASASDDKTVKLWNRNGQLLQTLTGH

SSSVWGVAFSPDGQTIASASDDKTVKLWNRNGQLLQTLTGH

5-bladed WRAP

GAMGSSSVWGVAFSPDGQTIASASDDKTVKLWNRNGQLLQTLTGH

SSSVWGVAFSPDGQTIASASDDKTVKLWNRNGQLLQTLTGH

SSSVWGVAFSPDGQTIASASDDKTVKLWNRNGQLLQTLTGH

SSSVWGVAFSPDGQTIASASDDKTVKLWNRNGQLLQTLTGH

SSSVWGVAFSPDGQTIASASDDKTVKLWNRNGQLLQTLTGH

6-bladed WRAP

GAMGSSSVWGVAFSPDGQTIASASDDKTVKLWNRNGQLLQTLTGH

SSSVWGVAFSPDGQTIASASDDKTVKLWNRNGQLLQTLTGH

SSSVWGVAFSPDGQTIASASDDKTVKLWNRNGQLLQTLTGH

SSSVWGVAFSPDGQTIASASDDKTVKLWNRNGQLLQTLTGH

SSSVWGVAFSPDGQTIASASDDKTVKLWNRNGQLLQTLTGH

SSSVWGVAFSPDGQTIASASDDKTVKLWNRNGQLLQTLTGH
