# Supplementary material for: Structural diversity of oligomeric β-propellers with different numbers of identical blades
Source: eLife journal article supplement (doi:10.7554/elife.49853), 2019-10-15
Supplement: supp [file elife_poa_e49853_Figure_3_figure_supplement_1.pdf › elife_poa_e49853_Figure_3_figure_supplement_1.pdf]

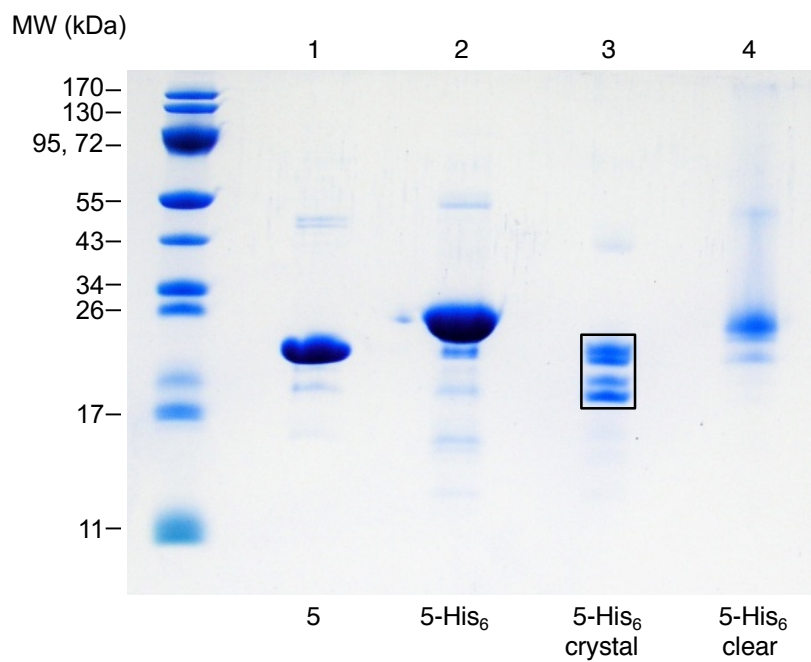

*bbbbb*      *bbbbbb*    *bbbbbbb*      *bbbb*  
MKHHHHHPMSDYDIPTTENLYFQGAMGSSSVWGVA*FSPDGQTIASASDDKTVKLWNRNGQLLQTLTGH*  
SSSVWGVA*FSPDGQTIASASDDKTVKLWNRNGQLLQTLTGH*  
SSSVWGVA*FSPDGQTIASASDDKTVKLWNRNGQLLQTLTGH*  
SSSVWGVA*FSPDGQTIASASDDKTVKLWNRNGQLLQTLTGH*  
SSSVWGVA*FSPDGQTIASASDDKTVKLWNRNGQLLQTLTGH*
