# Supplementary figures and images for: Structural diversity of oligomeric β-propellers with different numbers of identical blades
Source: eLife journal article supplement (doi:10.7554/elife.49853), 2019-10-15

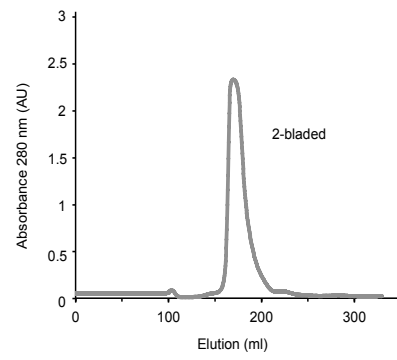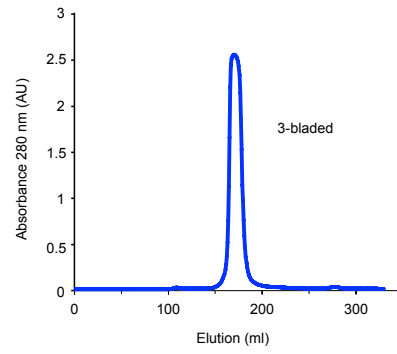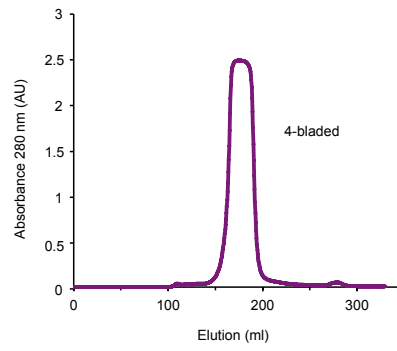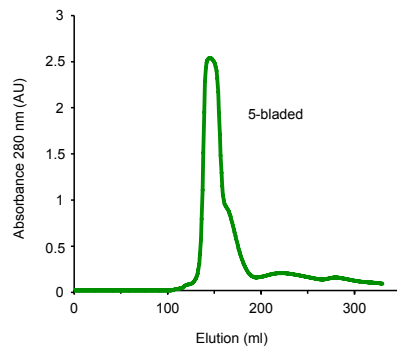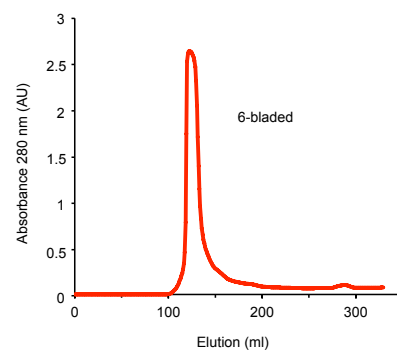

Supplement: supp [file elife_poa_e49853_Figure_2_figure_supplement_2.pdf › elife_poa_e49853_Figure_2_figure_supplement_2.pdf]
